# Supplementary material for: Identification of methylation biomarkers in colorectal carcinoma and their detection in circulating tumour cells
Source: Research Square preprint supplement (doi:10.21203/rs.3.rs-8234790/v1), 2025-12-11
Supplement: Supplementary file 1 [file 5a7d6078d5c77a783295c95d.xlsx]

## Sheet: Sheet1
Supplementary Table 1. Primer and probe sequences used for quantitative methylation-specific PCR (qMSP)
CpG Site	Gene	Primer/Probe	Sequence (5' → 3')
cg09944899	GPR125	Forward primer	TATTTGAGATGTTTATTAGTTCG
		Reverse primer	CCTACTTACAAACCTTCCAA
		Probe	AATAAACCCTAAACTTACAAATATTAAAACG
cg02450613	GDNF	Forward primer	GGAGATTCGAACGAGATATTACG
		Reverse primer	CCAACCTACGCTCCTAACG
		Probe	TTAATCGGCGCGGGGAGTTTCGTGAAGA
cg08021727	ADCY9	Forward primer	AGGTAGTTATTAGGAGATTTCG
		Reverse primer	CTACGTCTCTTAAAATCCAC
		Probe	ACACAACTCACTAAAAAAACAAACTACCG
β-actin	ACTB	Forward primer	TGGTGATGGAGGAGGTTTAGTAAGT
(Reference)		Reverse primer	AACCAATAAAACCTACTCCTCCCTTAAA
		Probe	ACCACCACCCAACACACAATAACAAACACA
