# Supplementary material for: Identification of methylation biomarkers in colorectal carcinoma and their detection in circulating tumour cells
Source: Research Square preprint supplement (doi:10.21203/rs.3.rs-8234790/v1), 2025-12-11
Supplement: Supplementary file 2 [file 6638acc863dbe8a98575d2c1.xlsx]

## Sheet: ADCY9
Supplementary Table2-1 Clinical associations of methylation levels at prognostic CpG sites in tumour tissues cg08021727 in colorectal cancer tissues
Methylation Site	Gene	Tissue Type	Clinical Variable	P value
cg08021727	ADCY9	Tumour	Sex	1
cg08021727	ADCY9	Tumour	Age	0.2
cg08021727	ADCY9	Tumour	Synchronous tumour	0.641
cg08021727	ADCY9	Tumour	Metachronous tumour	1
cg08021727	ADCY9	Tumour	Perforation	0.554
cg08021727	ADCY9	Tumour	Site	0.602
cg08021727	ADCY9	Tumour	Subsite2	1
cg08021727	ADCY9	Tumour	Diagnosis type	0.449
cg08021727	ADCY9	Tumour	Tumour size	0.445
cg08021727	ADCY9	Tumour	Grade	0.176
cg08021727	ADCY9	Tumour	T stage	0.747
cg08021727	ADCY9	Tumour	N stage	0.611
cg08021727	ADCY9	Tumour	Overall stage	0.76
cg08021727	ADCY9	Tumour	LVI	0.445
cg08021727	ADCY9	Tumour	Other neoplasm	0.029*
cg08021727	ADCY9	Tumour	Kras mutation	0.265
cg08021727	ADCY9	Tumour	Nras mutation	0.286
cg08021727	ADCY9	Tumour	MSI	0.52
cg08021727	ADCY9	Tumour	Braf mutation	0.752
Data are presented as p-values from Fisher's exact test or Mann-Whitney U test, as appropriate. LVI, lymphovascular invasion; MSI, microsatellite instability; CpG, cytosine-phosphate-guanine. P < 0.05 indicates statistical significance.

## Sheet: GDNF
Supplementary Table2-2 Clinical associations of methylation levels at prognostic CpG sites in tumour tissues
Methylation Site	Gene	Tissue Type	Clinical Variable	p value
cg02450613	GDNF	Tumour	Sex	0.61
cg02450613	GDNF	Tumour	Age rank	0.040*
cg02450613	GDNF	Tumour	Synchronous tumour	0.641
cg02450613	GDNF	Tumour	Metachronous tumour	1
cg02450613	GDNF	Tumour	Perforation	0.554
cg02450613	GDNF	Tumour	Site	0.017*
cg02450613	GDNF	Tumour	Subsite2	0.011*
cg02450613	GDNF	Tumour	Diagnosis type	1
cg02450613	GDNF	Tumour	Tumor size	0.203
cg02450613	GDNF	Tumour	Grade	0.027*
cg02450613	GDNF	Tumour	T stage	0.035
cg02450613	GDNF	Tumour	N stage	0.127
cg02450613	GDNF	Tumour	Overall stage	0.494
cg02450613	GDNF	Tumour	LVI	0.041*
cg02450613	GDNF	Tumour	Other neoplasm	0.349
cg02450613	GDNF	Tumour	Kras mutation	0.196
cg02450613	GDNF	Tumour	Nras mutation	0.412
cg02450613	GDNF	Tumour	MSI	0.199
cg02450613	GDNF	Tumour	Braf mutation	0.106
Data are presented as p-values from Fisher's exact test or Mann-Whitney U test, as appropriate. LVI, lymphovascular invasion; MSI, microsatellite instability; CpG, cytosine-phosphate-guanine. p< 0.05 indicates statistical significance.

## Sheet: GPR125
Supplementary Table2-3 Clinical associations of methylation levels at prognostic CpG sites in tumor tissues
Methylation Site	Gene	Tissue Type	Clinical Variable	P value
cg09944899	GPR125	Tumour	Sex	1
cg09944899	GPR125	Tumour	Age rank	0.442
cg09944899	GPR125	Tumour	Synchronous tumour	0.641
cg09944899	GPR125	Tumour	Metachronous tumour	1
cg09944899	GPR125	Tumour	Perforation	0.554
cg09944899	GPR125	Tumour	Site	0.297
cg09944899	GPR125	Tumour	Subsite2	0.307
cg09944899	GPR125	Tumour	Diagnosis type	0.017*
cg09944899	GPR125	Tumour	Tumor size	0.799
cg09944899	GPR125	Tumour	Grade	0.176
cg09944899	GPR125	Tumour	T stage	0.268
cg09944899	GPR125	Tumour	N stage	0.611
cg09944899	GPR125	Tumour	Overall stage	0.635
cg09944899	GPR125	Tumour	LVI	0.041*
cg09944899	GPR125	Tumour	Other neoplasm	0.026*
cg09944899	GPR125	Tumour	Kras mutation	0.648
cg09944899	GPR125	Tumour	Nras mutation	0.412
cg09944899	GPR125	Tumour	MSI	0.52
cg09944899	GPR125	Tumour	Braf mutation	0.809
Data are presented as p-values from Fisher's exact test or Mann-Whitney U test, as appropriate. LVI, lymphovascular invasion; MSI, microsatellite instability; CpG, cytosine-phosphate-guanine. p < 0.05 indicates statistical significance.
